# Supplementary material for: Reciprocal knock-in mice to investigate the functional redundancy of lamin B1 and lamin B2
Source: PubMed Central journal article supplement — Mol Biol Cell. 2014 May 15;25(10):1666–75. doi: 10.1091/mbc.E14-01-0683 (PMC4019497; doi:10.1091/mbc.e14-01-0683), 2014-05-15
Supplement: supp_E14-01-0683v1_CombinedSupMats.pdf [file supp_E14-01-0683v1_CombinedSupMats.pdf]

# Supplemental Materials

*Molecular Biology of the Cell*

Lee et al.

Supplementary Material

Reciprocal knock-in mice to investigate the functional redundancy of lamin B1 and lamin B2  
by John M. Lee and coworkers

| E18.5 embryos                          | Body weight (g) | P value              |
|----------------------------------------|-----------------|----------------------|
| Wild-type (n = 22)                     | 1.20 ± 0.14     |                      |
| <i>Lmnb1</i> <sup>B2/B2</sup> (n = 10) | 0.86 ± 0.12     | < 0.001 <sup>a</sup> |
| <i>Lmnb2</i> <sup>B1/B1</sup> (n = 20) | 1.18 ± 0.11     | 0.65 <sup>a</sup>    |
| <i>Lmnb1</i> <sup>-/-</sup> (n = 5)    | 0.69 ± 0.08     | 0.007 <sup>b</sup>   |

| E18.5 embryos                          | Brain weight (g) | P value              |
|----------------------------------------|------------------|----------------------|
| Wild-type (n = 22)                     | 0.09 ± 0.01      |                      |
| <i>Lmnb1</i> <sup>B2/B2</sup> (n = 10) | 0.05 ± 0.01      | < 0.001 <sup>a</sup> |
| <i>Lmnb2</i> <sup>B1/B1</sup> (n = 20) | 0.06 ± 0.01      | < 0.001 <sup>a</sup> |
| <i>Lmnb1</i> <sup>-/-</sup> (n = 5)    | 0.03 ± 0.01      | < 0.001 <sup>b</sup> |

| E18.5 embryos                                                       | Brain weight (g) | P value            |
|---------------------------------------------------------------------|------------------|--------------------|
| <i>Lmnb1</i> <sup>B2/B2</sup> (n = 10)                              | 0.05 ± 0.01      |                    |
| <i>Lmnb1</i> <sup>B2/B2</sup> <i>Lmnb2</i> <sup>B1/B1</sup> (n = 5) | 0.06 ± 0.01      | 0.002 <sup>b</sup> |

**Supplementary Table 1.** Body and brain weights of wild-type, *Lmnb1*<sup>B2/B2</sup>, *Lmnb1*<sup>B1/B1</sup>, *Lmnb1*<sup>-/-</sup>, and *Lmnb1*<sup>B2/+</sup> *Lmnb2*<sup>B1/B1</sup> mice. <sup>a</sup>, compared with wild-type embryos; <sup>b</sup>, compared with *Lmnb1*<sup>B2/B2</sup> embryos.

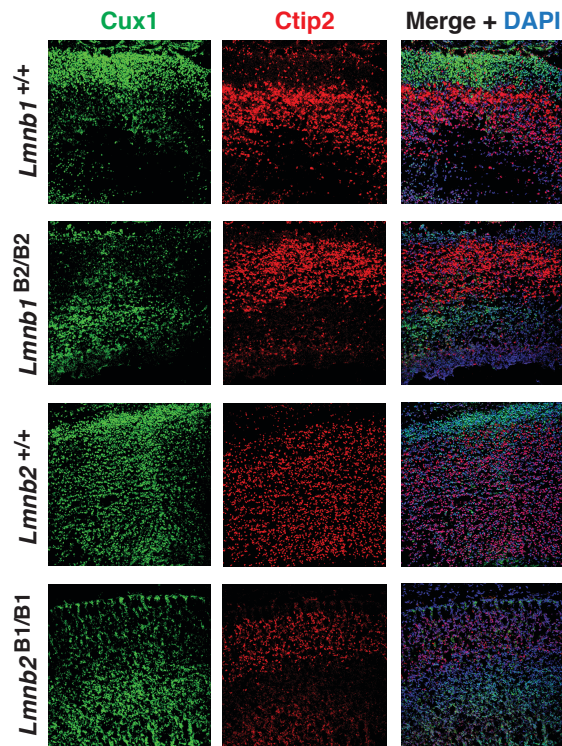

**Supplementary Figure 1.** Abnormal layering of neurons in the cerebral cortex of wild-type, *Lmnb1*<sup>B2/B2</sup>, and *Lmnb1*<sup>B1/B1</sup> embryos. Immunostaining of sections from the cerebral cortex of E18.5 embryos with antibodies against Cux1 and Ctip2. In wild-type brains, Cux1 was predominantly located in more superficial layers (compared with Ctip2). Significant amounts of Ctip2 were found in more superficial regions of the cortex in *Lmnb1*<sup>B2/B2</sup> and *Lmnb1*<sup>B1/B1</sup> embryos.
